# Supplementary material for: An epigenomic shift in amygdala marks the transition to maternal behaviors in alloparenting virgin female mice
Source: PubMed Central journal article supplement (PMC8863255; doi:10.1371/journal.pone.0263632), 2022-02-22

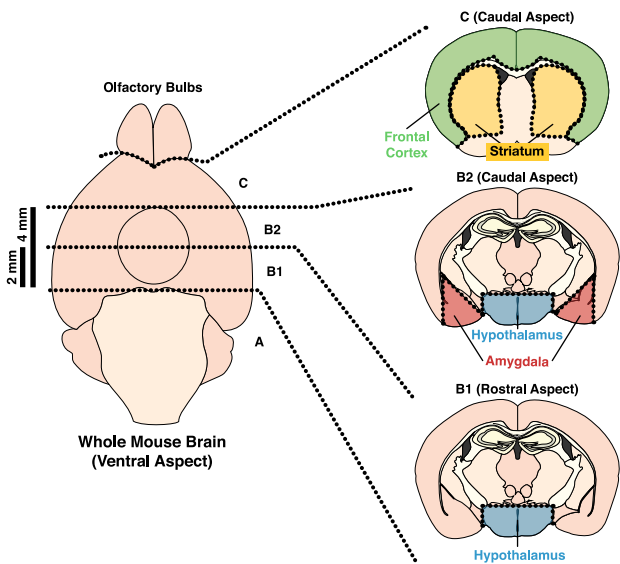

Supplement: pone.0263632.s001.pdf [file pone.0263632.s001.pdf]
